# Supplementary material
Source: ML conference proceedings conference paper supplement (https://aclanthology.org/2026.semeval-1.383)

(a) Language distribution

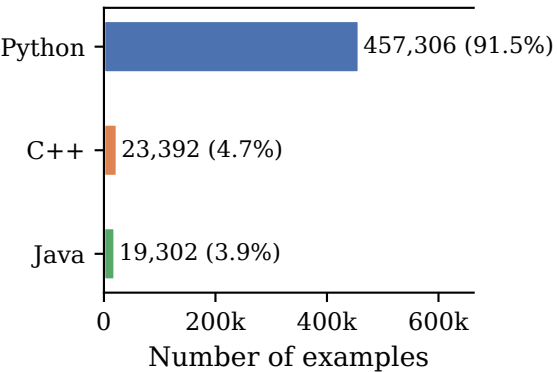

(b) Code length distribution

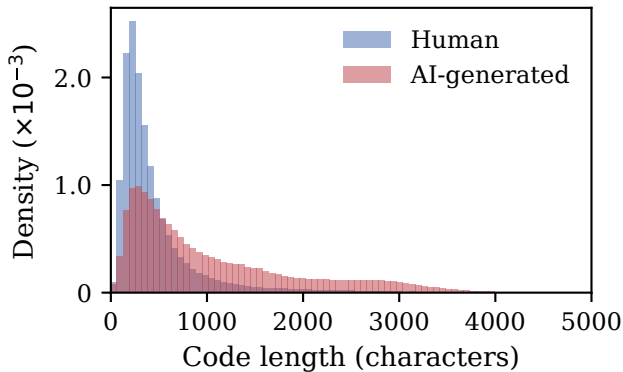

Supplement: SupplementaryMaterial [file subtask_a_data-crop.pdf › figures/subtask_a_data-crop.pdf]

(a) Language distribution

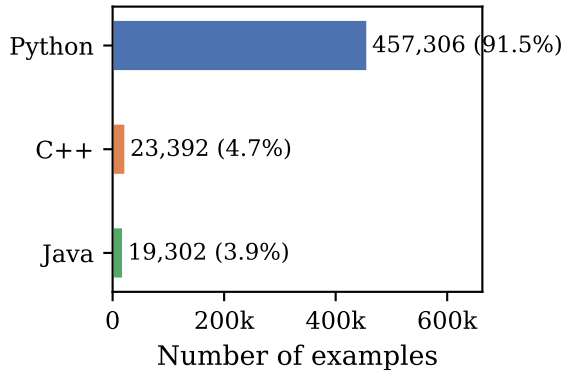

(b) Code length distribution

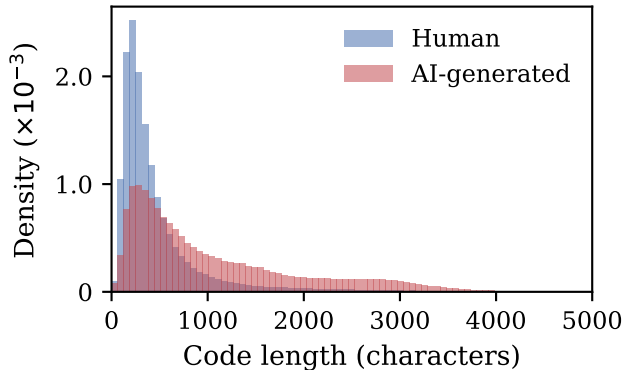

Supplement: SupplementaryMaterial [file subtask_a_data.pdf › figures/subtask_a_data.pdf]

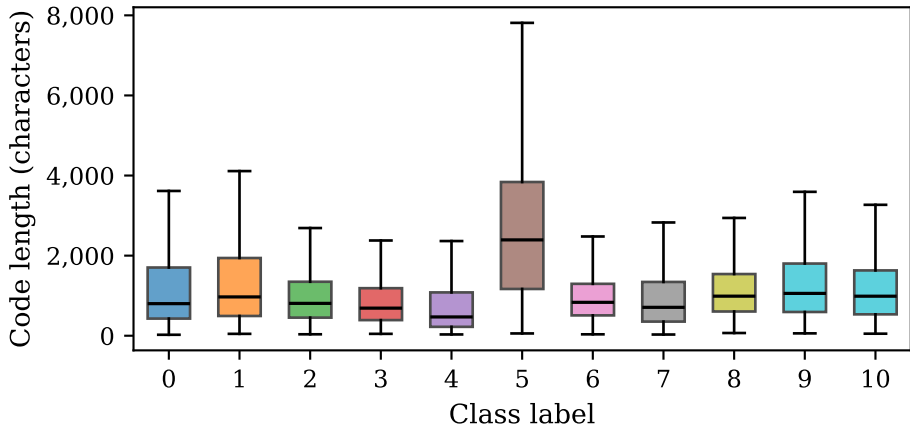

Supplement: SupplementaryMaterial [file subtask_b_codelength.pdf › figures/subtask_b_codelength.pdf]

(a) Class distribution

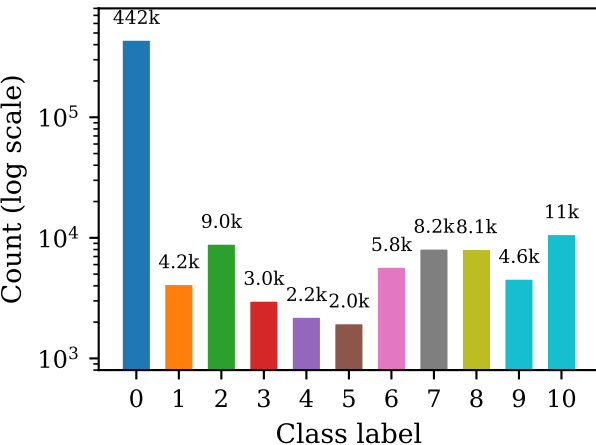

(b) Language distribution

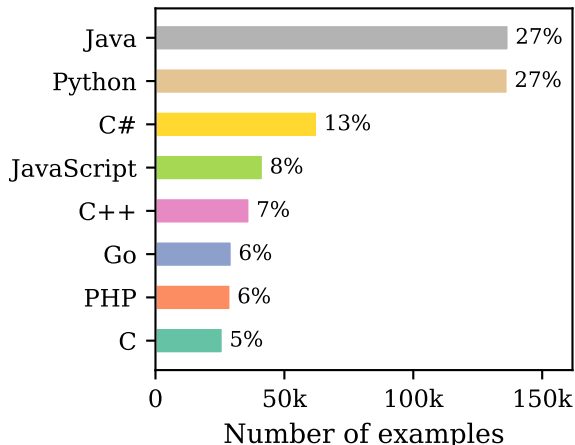

Supplement: SupplementaryMaterial [file subtask_b_data-crop.pdf › figures/subtask_b_data-crop.pdf]

(a) Class distribution

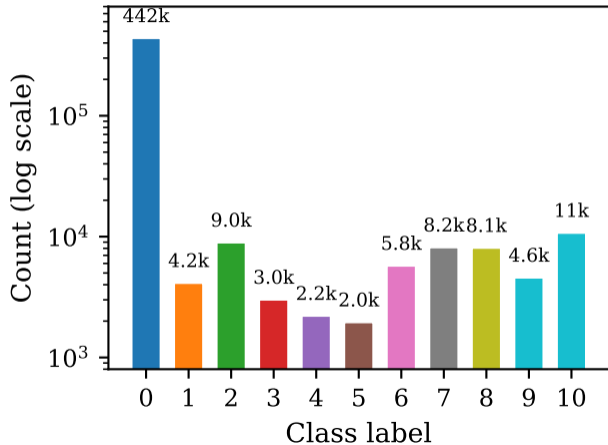

(b) Language distribution

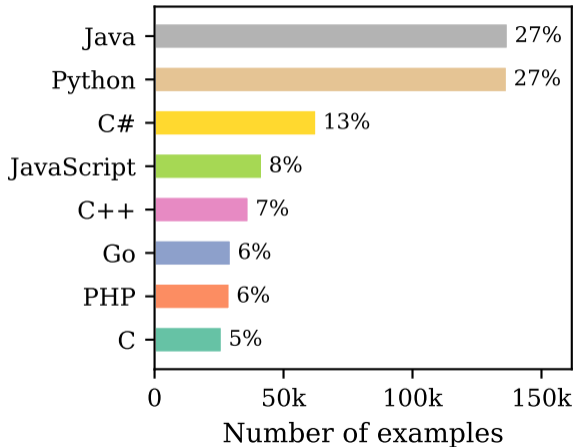

Supplement: SupplementaryMaterial [file subtask_b_data.pdf › figures/subtask_b_data.pdf]
